# Supplementary material
Source: publisher figshare collection journal article supplement (https://future-science-group.figshare.com/ndownloader/files/31698056)
Supplement: Supplementary file 1 [file 31698056]

## Sheet: Children
DMR	pval	padj	log2err	ES	NES	size	leadingEdge
PRDM8	1e-10	3.892e-07	#N/A	-0.751209	-2.81505	45	cg09595050, cg03404272, cg22961278, cg05059566, cg14197071, cg27639662, cg27111250, cg10129063, cg26299084, cg27018912, cg03463411, cg10694470, cg04235768, cg05452645, cg06307913, cg18073471, cg19409579, cg11388320, cg06373870, cg02458885, cg22902505, cg06440348, cg07857469, cg16117799, cg27242132, cg04343891, cg01304890, cg14489346, cg04214966
HOXB3	1e-10	3.892e-07	#N/A	-0.725979	-2.75072	48	cg24761525, cg00524443, cg23578243, cg02836478, cg04021898, cg13293524, cg13280788, cg12910797, cg22053945, cg05323879, cg03260240, cg07850987, cg24767968, cg04117801, cg25618372, cg06395298, cg21474786, cg01629240, cg24095592, cg04478678, cg01990102, cg13479204, cg01593673, cg19104015, cg15255390, cg00842549, cg21399057
SESN3	1.00108e-09	2.16455e-06	0.788187	-0.767408	-2.62973	29	cg11453061, cg17980625, cg23180092, cg25796915, cg09653626, cg23565445, cg03680032, cg17780291, cg13037275, cg03605838, cg25912779, cg08881680, cg10557147, cg14547393, cg21635157, cg23881287, cg06453912, cg07584320
HOXA4	6.81189e-10	1.89371e-06	0.801216	-0.821896	-2.60588	22	cg25952581, cg11410718, cg22997113, cg03724423, cg17591595, cg24169822, cg19142026, cg04317399, cg14359292, cg07317062, cg17457637, cg11908057, cg08657492, cg15196806, cg23884241, cg11015251
BCOR	1e-10	3.892e-07	#N/A	-0.55072	-2.5824	143	cg15627188, cg04413754, cg23737407, cg07096038, cg05804339, cg23701759, cg15887754, cg01514943, cg10856819, cg00016934, cg25490273, cg00615738, cg26748472, cg05200893, cg07650640, cg03527511, cg15133344, cg15314890, cg05026884, cg26713021, cg12870539, cg00261039, cg10169869, cg02602182, cg08174182, cg06010380, cg14393968, cg15039826, cg02932805, cg07688057, cg11650160, cg01321830, cg11117255, cg1…
ZNF562	5.19277e-09	8.37491e-06	0.761461	-0.882863	-2.45804	14	cg10755961, cg24874111, cg09668689, cg14073063, cg22391421, cg21610904, cg18587364, cg20154743, cg17704570, cg08464036, cg20631204, cg17691880
HOXA5	8.2985e-08	8.9716e-05	0.704976	-0.684819	-2.45318	36	cg19759481, cg04863892, cg09207400, cg14014955, cg02916332, cg20817131, cg23454797, cg17569124, cg25307665, cg23936031, cg16997642, cg20517050, cg26023912, cg08070327, cg17432857, cg07049592, cg02005600, cg14882265, cg03207666, cg03368099, cg09549073, cg14058329, cg25390165, cg01748892, cg19643053
VWDE	1.23707e-08	1.50458e-05	0.74774	-0.865879	-2.44501	15	cg03579179, cg19397885, cg06484146, cg20607287, cg05205670, cg20099180, cg10578991, cg26280682, cg16278512
SLC22A20	1.99866e-09	3.53582e-06	0.774939	-0.948165	-2.39809	10	cg22920635, cg21080921, cg02707152, cg02780017, cg25010124, cg17656098, cg14373018, cg10133725, cg03219657
MAGI2	1.2188e-06	0.000765091	0.643552	-0.729563	-2.3763	24	cg02699069, cg17880166, cg21784917, cg13382769, cg04671932, cg24021956, cg20996682, cg20537629, cg05902852, cg24391460, cg14464244, cg12258161, cg07985720, cg17463145, cg05270344
MCCC1	1.42431e-07	0.000131986	0.690132	-0.833016	-2.37582	16	cg22211233, cg08395365, cg07464924, cg00161968, cg05496383, cg03318940, cg02616966, cg04991337, cg22801868, cg00890010, cg23166970
GABRA5	5.14715e-07	0.000385244	0.659444	-0.679587	-2.37202	31	cg10652393, cg10606856, cg03325535, cg02356993, cg11786657, cg00329728, cg15035033, cg20005743, cg01378667, cg19005707, cg18255240, cg22523852, cg21276413, cg05044185, cg04286377, cg14508508, cg22363043, cg17710023
TRIOBP	8.38434e-07	0.000604293	0.659444	-0.709388	-2.36539	26	cg14268632, cg10921709, cg22706634, cg06594770, cg12379720, cg06644488, cg05691152, cg13897416, cg11540735, cg12325455, cg03313666, cg11679014, cg09192333
TMEM204	9.96981e-07	0.000646708	0.643552	-0.706826	-2.35685	26	cg06602086, cg27594616, cg26390081, cg07639376, cg08296037, cg02193187, cg00463982, cg10465839, cg11375102, cg07341220, cg06565913, cg10698762, cg16336651
HOXA2	1.26428e-06	0.000768839	0.643552	-0.714542	-2.35542	25	cg06055873, cg17353412, cg09871315, cg13985518, cg04481096, cg23979631, cg02225599, cg06166490, cg04027736, cg20747380, cg26069745, cg22943986, cg23206851, cg06401979, cg02979457, cg00445443, cg01217984, cg06769202, cg09908750, cg19432993
CETN3	9.65345e-07	0.000646708	0.643552	-0.824838	-2.29649	14	cg23928910, cg02473687, cg08935243, cg14993293, cg15640707, cg07744993, cg05059158, cg20713816, cg06187252, cg11589797
FGFR2	1.8992e-06	0.00105596	0.643552	-0.631346	-2.28397	38	cg02412684, cg02210151, cg25052156, cg17681491, cg18566515, cg22633036, cg13437682, cg01385327, cg06791446, cg11430259, cg07250222, cg10379346, cg13175830, cg17710779, cg07877847, cg10788901
APOB	1.65432e-06	0.000975549	0.643552	-0.862263	-2.27062	12	cg14644031, cg20689167, cg26112457, cg15246511, cg07636176, cg25123895, cg03350299, cg25071744, cg24309555, cg16306978, cg16723488
HOXB5	1.08779e-05	0.00390802	0.593325	-0.758757	-2.26532	18	cg01405107, cg05487507, cg20184247, cg00632306, cg14126688, cg03809346, cg08189801, cg10153335, cg18127922
MED14	1.96715e-06	0.00106336	0.627257	-0.85948	-2.26329	12	cg09504728, cg03465847, cg17165799, cg22961098, cg04507972, cg27522270, cg02302131, cg00573298, cg24682488, cg20332242
SLITRK1	1.10453e-05	0.00390802	0.593325	-0.671353	-2.25948	27	cg24905385, cg10236414, cg20826348, cg08954631, cg21448057, cg13988851, cg16727923, cg19610077, cg18937395, cg02365360, cg25938646, cg14246335, cg26799881, cg19696317, cg07104706, cg02772430
HAPLN1	4.87999e-06	0.00208704	0.610527	-0.631563	-2.23912	34	cg06434428, cg10962524, cg24314587, cg12199221, cg09893305, cg18024167, cg24352321, cg08667279, cg18343881, cg10536076, cg01045835, cg15083037, cg12923574, cg04526399, cg06046858
ZNF695	3.42943e-06	0.0017112	0.627257	-0.850071	-2.23851	12	cg22502715, cg22385719, cg25794766, cg04305539, cg12629875, cg20324884
CRYZ	1.9065e-05	0.00579696	0.57561	-0.731322	-2.23811	19	cg09502221, cg26855724, cg10128416, cg26457504, cg04250926, cg07399417, cg13528603, cg00121533, cg21906852, cg21145145, cg21535942, cg26752657, cg09200014
TBX15	2.18982e-07	0.000185277	0.690132	-0.574508	-2.23188	55	cg21170796, cg17868079, cg06204711, cg23371746, cg26272623, cg24884142, cg05363616, cg27262412, cg23588217, cg25507958, cg09789768, cg05329979, cg24144440, cg00173504, cg13080379, cg10703826, cg12664119, cg25273091, cg14565725, cg06158650, cg21647227, cg00466334, cg24720355
CXorf38	4.9334e-06	0.00208704	0.610527	-0.844179	-2.22299	12	cg17041400, cg18364820, cg20137045, cg15322570, cg16371488, cg22148243, cg13645941, cg16776114, cg03169432, cg15587142
NPY	4.54518e-06	0.00205696	0.610527	-0.787205	-2.22285	15	cg26418900, cg18106668, cg12614105, cg21097881, cg05158615, cg01050885, cg24885417, cg16964348, cg15929698, cg00355281, cg25884711
PABPC1L	1.33725e-05	0.00448671	0.593325	-0.81129	-2.20243	13	cg03839625, cg15588266, cg09022458, cg17255214, cg00501711, cg24178500, cg05877425, cg09328228, cg21787727, cg11674690
GTF3C6	9.855e-06	0.00383556	0.593325	-0.749465	-2.20027	17	cg04140496, cg24030120, cg27151360, cg25531478, cg05449607, cg15319017, cg00858015, cg18873593, cg02359132, cg18710383, cg00531924, cg12072757
MLC1	5.15504e-05	0.0122338	0.557332	-0.710216	-2.17351	19	cg07863159, cg18093120, cg20194973, cg03677952, cg19194233, cg07310406, cg17169998, cg08660915, cg06495501, cg20266220, cg10854441, cg25127852, cg11422921
PARK2	2.91195e-05	0.00809215	0.57561	-0.834604	-2.16729	11	cg18825119, cg14584255, cg18566984, cg21926612, cg22418394, cg06582575, cg21717959
HPN	1.54694e-05	0.00485538	0.57561	-0.766416	-2.16415	15	cg03136563, cg20584801, cg08772127, cg06151964, cg06672753, cg15234271, cg24715735, cg15180656, cg08380252, cg02060639, cg05701235
GRAP2	3.9445e-05	0.010373	0.557332	-0.597938	-2.14195	36	cg14934932, cg00594278, cg14963216, cg06495135, cg18545596, cg03840259, cg20545648, cg03119750, cg23084667, cg18739740, cg21012238, cg01538218, cg26815454, cg16070350, cg18302273, cg26053642, cg20131654
BLOC1S3	9.25288e-05	0.0173304	0.538434	-0.697555	-2.13477	19	cg00814580, cg15176664, cg00249181, cg04881464, cg15150615, cg07928695, cg18332849, cg23256630
C6orf138	3.56546e-05	0.00963663	0.557332	-0.843628	-2.13369	10	cg00457913, cg01612730, cg27250236, cg09816507, cg24035447, cg11848487, cg21292008, cg23618440
TAGLN3	3.67333e-05	0.0097922	0.557332	-0.74807	-2.13355	16	cg09533597, cg14770958, cg19299034, cg08570199, cg19778003, cg25183613, cg20925462, cg10053169, cg20126106, cg04671541, cg11104313, cg19824689, cg13441378
CBX7	6.26202e-05	0.013692	0.538434	-0.821162	-2.13239	11	cg10339854, cg01525244, cg00545295, cg21670631, cg03804568, cg20693706, cg11724393
ST6GAL2	4.11075e-05	0.0104156	0.557332	-0.633047	-2.13198	28	cg19501858, cg14507868, cg06906472, cg21649258, cg19412467, cg19302831, cg04571163, cg08528626, cg25725843, cg12800781, cg19825856, cg20483857, cg20638140, cg20803857, cg04434339, cg10881311
HMGN4	0.000146335	0.0237839	0.518848	-0.690646	-2.1264	20	cg17624892, cg04370575, cg09190325, cg08135787, cg08039689, cg27464755, cg10721359, cg18635670, cg21612666, cg03782956, cg15776653, cg05604668, cg11734862, cg09711421, cg09904177
DCAF6	4.40318e-05	0.0109854	0.557332	-0.806571	-2.12396	12	cg02496808, cg05702448, cg05300697, cg13497939, cg10020897, cg09080951
DUSP22	4.07887e-05	0.0104156	0.557332	-0.839264	-2.12265	10	cg04267224, cg11235426, cg17604214, cg05064044, cg03395511, cg07332563, cg21548813, cg18110333, cg17876578
PNRC1	4.5168e-05	0.0110892	0.557332	-0.805942	-2.1223	12	cg18317589, cg06985640, cg25100365, cg06823247, cg01570769, cg05624707, cg00200298
PRKG1	8.06691e-05	0.0161837	0.538434	-0.65591	-2.12149	23	cg27380599, cg19242923, cg09019938, cg09072266, cg23828595, cg04004590, cg13719243, cg20416031, cg05603630, cg05166744, cg19739082, cg05396900, cg13097248, cg16028222
RRP8	0.000114529	0.0202613	0.538434	-0.709213	-2.11741	18	cg15721728, cg19527269, cg24622205, cg08646467, cg21023284, cg14748682, cg14305557, cg18251255
ZNF833	2.62053e-05	0.00739065	0.57561	-0.86835	-2.11303	9	cg05950877, cg15209566, cg21771200, cg22351510, cg04598224, cg00777011, cg26772540, cg26590664
TBX5	6.89336e-06	0.00279468	0.610527	-0.550344	-2.10678	51	cg13628942, cg21907579, cg12670347, cg23820885, cg08318726, cg09623338, cg08087594, cg16559598, cg19290410, cg15025170, cg14264795, cg09042277, cg16805360, cg06717557, cg16605327, cg04002444, cg10077319, cg18554826, cg17645823, cg05929882, cg17462200, cg03569640, cg00182639, cg11841394, cg23827572
ETV5	9.43997e-05	0.0173304	0.538434	-0.651352	-2.10675	23	cg27400923, cg04709551, cg18269183, cg16655375, cg01270378, cg04783896, cg01519765, cg21923992, cg17466567, cg11762904, cg02401761
RIBC1	9.36369e-05	0.0173304	0.538434	-0.774322	-2.10207	13	cg22311608, cg07143052, cg14993456, cg00359973, cg02353937, cg24091241, cg11449070, cg12221068, cg01404988, cg04932149
OXSR1	7.74308e-05	0.0159088	0.538434	-0.736111	-2.09944	16	cg25234080, cg00798206, cg11213348, cg12892799, cg12794234, cg24721874, cg05065765, cg11094694, cg02842972, cg19728055
DDX3X	0.000144678	0.0237839	0.518848	-0.804135	-2.08817	11	cg24751934, cg02892589, cg11251991, cg06355439, cg17823667, cg03102848, cg27042767, cg12689375
FAIM	0.000199888	0.0260781	0.518848	-0.666717	-2.08447	21	cg18178505, cg15916166, cg18195384, cg13538845, cg04148458, cg01025283, cg22175303, cg17462391, cg19188109, cg25201910, cg06309968, cg02712878, cg17724207, cg09429345
ESPNL	9.19241e-05	0.0173304	0.538434	-0.791524	-2.08434	12	cg09095748, cg19391697, cg06574296, cg04003327, cg15871206, cg15462953, cg09039163, cg01112020, cg02413938, cg18693308
FOXG1	9.82897e-05	0.0178759	0.538434	-0.623921	-2.08041	26	cg16038120, cg21923619, cg07150445, cg02681442, cg18299578, cg07974473, cg19714132, cg10300684, cg10828337, cg10912240, cg17525102, cg05872306, cg19786627, cg04525757, cg23191956, cg26194477, cg26206396, cg08120263, cg27006650
CD226	0.000170381	0.0250547	0.518848	-0.679583	-2.07977	19	cg13164537, cg12929678, cg26246840, cg20768743, cg04168704, cg26848442, cg03955765, cg00368259, cg24092170, cg12280202, cg17397365, cg25427967, cg13574580, cg15663348
HS3ST4	9.22993e-05	0.0173304	0.538434	-0.821601	-2.07798	10	cg26933063, cg02390209, cg24862668, cg26734696, cg27312986, cg10311610
DKK4	0.000103765	0.0185254	0.538434	-0.820025	-2.074	10	cg18407008, cg00828762, cg21209091, cg16197636, cg01762581, cg02571142, cg06899970, cg09297903
SMC1A	0.00017526	0.0250547	0.518848	-0.798578	-2.07374	11	cg22311608, cg07143052, cg14993456, cg00359973, cg24091241, cg11449070, cg12221068, cg01404988, cg04932149
HOXC4	3.47528e-07	0.000270516	0.674963	-0.450177	-2.07126	131	cg15611151, cg18922524, cg07080050, cg19696083, cg25122233, cg27305809, cg26201952, cg08465346, cg00243574, cg15772924, cg07545037, cg16937769, cg03305955, cg27002522, cg15817960, cg26019295, cg25975485, cg04704531, cg21582112, cg03441067, cg23697546, cg26035702, cg03144714, cg00560793, cg18266450, cg09375394, cg00040312, cg22621272, cg26472714, cg03207151, cg07915976, cg22370252, cg02721000, cg0…
TCEA3	0.000178962	0.0250547	0.518848	-0.762172	-2.06909	13	cg15040770, cg09896346, cg07736389, cg26299174, cg06177627, cg12023170, cg12692722, cg17323828, cg12400807
IBTK	0.000130737	0.0223171	0.518848	-0.702961	-2.06375	17	cg18341116, cg10797726, cg04444925, cg01028770, cg11204983, cg25930748, cg17076789, cg14868258, cg00880984
EPHA5	0.000190508	0.025745	0.518848	-0.648711	-2.05679	22	cg12682684, cg14810013, cg02355420, cg17644293, cg25798792, cg09448373, cg09009536, cg24620673, cg05191076, cg03143681, cg02911686, cg13796804, cg02463418, cg00130165
GEMIN8	0.000178597	0.0250547	0.518848	-0.737462	-2.05322	14	cg13675330, cg21239691, cg21302017, cg19638648, cg07413830, cg04574552, cg05673087, cg09324116, cg21985559, cg19233518
LOC441046	0.000120052	0.021047	0.538434	-0.841615	-2.04798	9	cg01682021, cg06593050, cg18925923, cg18789841
MTRF1L	0.000163158	0.0250004	0.518848	-0.724702	-2.04636	15	cg06529343, cg21064641, cg00661010, cg18075454, cg17195852, cg14426517, cg07959982
PSKH2	0.000124807	0.0214932	0.518848	-0.840916	-2.04628	9	cg04470072, cg09506473, cg26186954, cg19587887, cg20982735, cg27340506, cg15541630
HNRPA1L-2	0.000189405	0.025745	0.518848	-0.717282	-2.04574	16	cg09060496, cg02049941, cg06399839, cg08288469, cg12263485, cg09653879, cg20545544, cg24505978, cg11338003, cg03689456
TOM1L1	0.000183957	0.0253886	0.518848	-0.696807	-2.04568	17	cg01793988, cg05265484, cg12240603, cg25431220, cg13141943, cg10812836, cg03870845, cg09175745, cg10237252
IFITM1	0.000163158	0.0250004	0.518848	-0.72405	-2.04452	15	cg21625464, cg09026253, cg21433170, cg04582010, cg08235948, cg10552523, cg06632214, cg01971407, cg27032101, cg20566897
CYR61	0.000167853	0.0250547	0.518848	-0.723382	-2.04264	15	cg20097073, cg12278431, cg02254587, cg07165167, cg07877243, cg04453065, cg23785940, cg25720697, cg13871826, cg05395648
CDH11	0.000167242	0.0250547	0.518848	-0.585061	-2.04209	31	cg18056414, cg04536893, cg16500501, cg23564028, cg02741158, cg07185854, cg06158347, cg12163490, cg01084990, cg04977618, cg03802982, cg11510825, cg15010714, cg09108073, cg03943568, cg08100806, cg12660963, cg08747777, cg01021552, cg26624576
PACRG	0.000302158	0.0346662	0.498493	-0.667164	-2.04176	19	cg14584255, cg18566984, cg21926612, cg22418394, cg06582575, cg15832436, cg06065608, cg21717959, cg25726357
SORCS1	0.000189346	0.025745	0.518848	-0.774392	-2.03922	12	cg12679398, cg26554592, cg03171723, cg24621437, cg24403845, cg22043472, cg07392385, cg08503601
BMP4	0.000261328	0.0310088	0.498493	-0.617552	-2.0357	25	cg01873886, cg08046044, cg16389901, cg24526899, cg09226388, cg18975764, cg19534551, cg00883329, cg16190896, cg18686155, cg16277510, cg01963240
HNRNPA1	0.000581825	0.0494424	0.477271	-0.660987	-2.03508	20	cg09060496, cg02049941, cg06399839, cg08288469, cg12263485, cg09653879, cg20545544, cg24505978, cg11338003, cg03689456
VENTX	0.000157533	0.0245247	0.518848	-0.573353	-2.03275	34	cg02089629, cg07370771, cg20112079, cg02317400, cg27610486, cg25699174, cg25153759, cg23105839, cg04652645, cg12666165, cg01222324, cg19580752, cg18002909, cg26285605, cg11466935, cg03002848
COL9A2	0.000371164	0.0390424	0.498493	-0.781811	-2.0302	11	cg26710722, cg12733396, cg06063903, cg26011014, cg01728173, cg18186394, cg04100190, cg23847109
ALDOC	0.000359692	0.0386295	0.498493	-0.747329	-2.0288	13	cg14501061, cg13990559, cg06135449, cg27183188, cg06367117, cg15835620, cg01971632
LCK	0.000225604	0.0283242	0.518848	-0.60512	-2.01772	26	cg04249754, cg14781242, cg20047483, cg11683242, cg10809828, cg18359575, cg05987644, cg00164084, cg07571745, cg12710152, cg10325497, cg05350315, cg20239639, cg06517940, cg17078393, cg01525376
MYO7A	0.00050842	0.0465738	0.477271	-0.77698	-2.01765	11	cg20062305, cg14708990, cg08036798, cg21437341, cg17441778, cg02420069, cg08294946
LOC404266	0.000331845	0.0366805	0.498493	-0.635869	-2.01607	22	cg05487507, cg20184247, cg21864868, cg00690402, cg18127922, cg24210813, cg09595185, cg10588962, cg12744859, cg13994241, cg19047868, cg00711072, cg25960038, cg21242356, cg05555337
HIST2H2BE	0.00039927	0.0408937	0.498493	-0.618198	-2.01357	24	cg23098012, cg13454251, cg03086563, cg01081836, cg00458210, cg23343444, cg04140924, cg12397297, cg08169409, cg07015494, cg25125105, cg09169269, cg19376709, cg09897416, cg17097571, cg15894563, cg06776953
PRKCDBP	0.000361283	0.0386295	0.498493	-0.705657	-2.01258	16	cg18392783, cg16459349, cg18959478, cg09362406, cg26678920, cg05628549, cg20938665, cg02273041, cg27132391
C3orf59	0.0001567	0.0245247	0.518848	-0.861056	-2.01153	8	cg01906709, cg11286907, cg24828455, cg07933199
CCDC180	0.000368221	0.0390424	0.498493	-0.795011	-2.01073	10	cg02890052, cg17560895, cg27594116, cg07774938, cg26528000, cg24160278, cg17794750, cg19118791
ABO	7.57835e-05	0.0158575	0.538434	-0.880386	-2.0069	7	cg07241568, cg06818865, cg11698867, cg12855781, cg24267699, cg24072567
SPATS1	0.000405274	0.0410762	0.498493	-0.793235	-2.00624	10	cg01925344, cg14669524, cg03400828, cg22970435, cg22674613
HMGCLL1	0.000318491	0.0359461	0.498493	-0.708984	-2.00198	15	cg06870213, cg22508969, cg13973820, cg06401021, cg10380163, cg05166820, cg12482573, cg16863375, cg21705897, cg26963356
DNAH9	0.000482215	0.045429	0.498493	-0.594389	-2.00046	27	cg25174591, cg19669126, cg03761343, cg18324798, cg27222778, cg15094819, cg14135174, cg11499681, cg20643012, cg11797949, cg07186448, cg23357250, cg22740925, cg20336857, cg14281612, cg15469944
RBBP7	0.000429175	0.0426109	0.498493	-0.701368	-2.00035	16	cg16784820, cg03048084, cg07096248, cg25666255, cg20246257, cg01985781, cg06293739, cg16978043
TRMT1	0.000434024	0.0428736	0.498493	-0.700522	-1.99793	16	cg12137530, cg07884270, cg22237401, cg02289791, cg17703834, cg24012887, cg12014333
COQ10B	0.000304621	0.0346662	0.498493	-0.680278	-1.99715	17	cg14054320, cg21184926, cg02462912, cg25808386, cg09533205, cg05724801, cg08357651, cg24988444
ATP6V1A	0.00023494	0.0292082	0.518848	-0.592651	-1.99593	28	cg22030770, cg15726556, cg26446348, cg17612853, cg14845865, cg01901898, cg27172310, cg11337765, cg02433905, cg17974142, cg10857271, cg07554478
ACSF3	0.000427117	0.0426109	0.498493	-0.55687	-1.99299	35	cg09384766, cg09427016, cg05104581, cg02441474, cg03172657, cg04753738, cg16555341, cg02193283, cg16754613, cg05537170, cg07065570, cg07661835, cg01123946, cg03346892, cg27329533, cg18963774, cg06187301
UBE2B	0.000488735	0.0455061	0.477271	-0.715086	-1.99092	14	cg04983925, cg12825946, cg01230929, cg18185885, cg06957820, cg08513100, cg09514527, cg11781344, cg18328404, cg00943950
CERK	0.000235647	0.0292082	0.518848	-0.851957	-1.99027	8	cg17099656, cg25280287, cg16154810, cg13221624, cg05698090
SOX1	0.00038596	0.0403805	0.498493	-0.614979	-1.98911	23	cg00663972, cg27301032, cg04047221, cg10245273, cg01757312, cg20829347, cg24604013, cg16705627, cg16747564, cg14842777, cg19802138, cg26151467, cg20194811, cg15653173, cg25476766
HS3ST2	0.000346477	0.0376672	0.498493	-0.67749	-1.98897	17	cg03132773, cg03757784, cg19064258, cg01574663, cg08214995, cg00885682, cg06365161, cg12825577, cg03033688
IGFBP3	0.000342716	0.0374677	0.498493	-0.566224	-1.98876	33	cg04796162, cg08027385, cg08831744, cg23455440, cg26434048, cg23191657, cg03776080, cg24901098, cg14625938, cg24772240, cg08541297, cg24381682, cg11753867, cg07869380, cg09619271, cg22083798, cg22403266, cg10094651, cg16447589
MFSD1	0.000393984	0.0408937	0.498493	-0.704132	-1.98828	15	cg16289538, cg24324441, cg11632438, cg19403653, cg01971181, cg12745387, cg06667063, cg13419925, cg20216950, cg26149032, cg23208397, cg07765813, cg25050026
AGT	0.000477477	0.045429	0.498493	-0.752183	-1.98074	12	cg00430155, cg07502417, cg14054578, cg24474852, cg19125606, cg09427468, cg07615755, cg12469306, cg08593269
DOK2	0.000441962	0.0434372	0.498493	-0.813136	-1.97868	9	cg14386061, cg08288130, cg03732056, cg13292636, cg16476235, cg21031128
LCTL	0.000486748	0.0455061	0.498493	-0.751071	-1.97781	12	cg15130899, cg09161630, cg11548311, cg11492287, cg15055378
B9D1	0.000572555	0.0490833	0.477271	-0.599265	-1.97542	25	cg22639195, cg23059366, cg14209627, cg18087791, cg07899794, cg08284801, cg21097105, cg04815426
GUCY1A3	0.000545703	0.0479243	0.477271	-0.622721	-1.97438	22	cg09456838, cg22276332, cg09750385, cg14603466, cg21176026, cg09912350, cg01263479, cg23912454, cg22643435, cg24508611, cg17714276, cg24867142
SCLY	0.000514562	0.0465738	0.477271	-0.748941	-1.9722	12	cg24586432, cg01613696, cg20679309, cg23303645, cg22352273, cg16631539, cg16334840
SDHAP3	0.000156896	0.0245247	0.518848	-0.864021	-1.9696	7	cg23189951, cg00307584
PA2G4	0.000533104	0.0475846	0.477271	-0.746536	-1.96587	12	cg12981099, cg09821339, cg21246785, cg10056728, cg06938235, cg21001214
ZSCAN16	0.00017751	0.0250547	0.518848	-0.861108	-1.96296	7	cg10832328, cg13045351, cg22614075, cg10876282, cg16103834
SCT	0.000580992	0.0494424	0.477271	-0.806325	-1.9621	9	cg02218884, cg00877321, cg10730078, cg18714560, cg05782292
TYW3	0.000551646	0.0479243	0.477271	-0.745082	-1.96204	12	cg09502221, cg26855724, cg10128416, cg07399417, cg13528603, cg21906852, cg21535942, cg26752657
PLA2G16	0.000590595	0.0497532	0.477271	-0.805253	-1.95949	9	cg14114326, cg06102777, cg03627015, cg13916322, cg15219506, cg05897048, cg16484943
NXPH1	0.000528127	0.0475378	0.477271	-0.667101	-1.95847	17	cg09894929, cg03099208, cg02124383, cg11977491, cg00948897, cg06444755, cg24785946, cg12976956, cg25273039, cg07934780, cg08723739, cg07462540, cg27293631, cg00852549
POU4F2	0.000483237	0.045429	0.498493	-0.836275	-1.95363	8	cg14631165, cg03561773, cg02610222, cg24199834, cg12935979
MED14OS	0.000168104	0.0250547	0.518848	-0.910414	-1.95317	6	cg09504728, cg17165799, cg02302131, cg24682488
RNF135	0.000537474	0.0475846	0.477271	-0.665078	-1.95253	17	cg18459618, cg20469139, cg11857033, cg08896939, cg03596034, cg04193820, cg04590184, cg18213979, cg01347228, cg09683562
LOC100130776	0.00024629	0.0295853	0.498493	-0.853755	-1.9462	7	cg16823042, cg06314111, cg23387569, cg11511175
LINC01258	0.000255497	0.0305029	0.498493	-0.852257	-1.94278	7	cg10942744, cg11993828, cg24481263, cg11616457, cg04322378
LOC102723376	0.000594349	0.0498434	0.477271	-0.830001	-1.93898	8	cg23947066, cg15244183, cg23708725, cg00703566, cg21218768, cg20937418
LGTN	0.000240005	0.0295601	0.518848	-0.901383	-1.9338	6	cg16639185, cg21936179, cg06753662, cg21155316, cg16966520
EYA4	0.000136154	0.0228409	0.518848	-0.504656	-1.93188	51	cg01401376, cg26501369, cg08712932, cg02446647, cg14270292, cg14287112, cg01162672, cg06181518, cg20093099, cg01805282, cg17722675, cg20286200, cg13854642, cg11664500, cg22871668, cg11518846, cg20330472, cg24176563, cg14817541, cg24842760, cg20422212, cg20787173, cg17348951, cg07327468, cg11942956, cg06132028
GSTM5	2.38952e-05	0.00694029	0.57561	-0.955576	-1.92295	5	cg25210835, cg24467349, cg20803293, cg14377951, cg12858902
GDNF	0.000175962	0.0250547	0.518848	-0.50108	-1.91292	50	cg07128111, cg03230469, cg00712841, cg24398268, cg07486383, cg23400942, cg23097534, cg21590264, cg04439218, cg26295057, cg26559974, cg11396695, cg07715201, cg03266646, cg16138150, cg02450613, cg15368455, cg25602684, cg16198719, cg14492800, cg20683765, cg07442479, cg21319053, cg17383727
HOXC6	0.000195579	0.0260683	0.518848	-0.486464	-1.90598	57	cg15611151, cg07080050, cg25122233, cg27305809, cg00243574, cg15772924, cg16937769, cg03305955, cg15817960, cg26019295, cg04704531, cg21582112, cg03441067, cg26035702, cg00560793, cg18266450, cg22621272, cg07915976, cg08106887, cg06714180, cg00506343, cg07461977, cg03892356, cg10593493, cg02491017, cg00567703
LRRC16A	0.00055978	0.0484147	0.477271	-0.833432	-1.89987	7	cg22532997, cg03048354, cg16015031, cg23456851, cg20955831
MIR10A	0.000596789	0.0498434	0.477271	-0.832992	-1.89887	7	cg26916621, cg14884929, cg15649236, cg07631144, cg07625849, cg01572694, cg13652985
MIR1826	0.000173097	0.0250547	0.518848	-0.93361	-1.87875	5	cg06617961, cg11032038, cg05992347, cg00677407
PAX6	5.91063e-05	0.0130705	0.557332	-0.45012	-1.85279	77	cg02642123, cg26932432, cg19006378, cg23484599, cg09656389, cg23933618, cg26848086, cg18400845, cg25242557, cg14439629, cg15927696, cg16004664, cg11482099, cg05091519, cg14002345, cg12086936, cg10115010, cg15931945, cg13769697, cg17280740, cg22272457, cg09217215, cg03527353, cg26315277
LOXL1-AS1	0.000450638	0.0435296	0.498493	-0.918434	-1.84821	5	cg17816518, cg14849716, cg04024170
GPR128	0.000511529	0.0465738	0.477271	-0.915807	-1.84292	5	cg02255511, cg23855093, cg04071964, cg12656272, cg07704151
KCNIP4	7.16812e-05	0.0153288	0.538434	-0.420172	-1.8214	98	cg22434409, cg07695835, cg13673570, cg11612852, cg00803186, cg16241043, cg27502188, cg27196467, cg08388763, cg22768129, cg06773116, cg26748440, cg16781992, cg18347642, cg18307463, cg10813306, cg18827773, cg06482428, cg27526346, cg15008665, cg15158924, cg10912084, cg17834768, cg12981901, cg18863062, cg23713724, cg24252656, cg11743349, cg27375642, cg00688962, cg18308184, cg23634395
IGF2	0.000286925	0.0334345	0.498493	-0.40453	-1.7428	94	cg22225943, cg05323345, cg10037494, cg13180496, cg19371526, cg08162473, cg06460568, cg05203776, cg13167664, cg10337079, cg11915650, cg23905216, cg17462140, cg15393937, cg22287492, cg13756879, cg26516510, cg19443075, cg13791131, cg13313518, cg20088847, cg05444816, cg05859777, cg21917949, cg21237591, cg07583420, cg00164727, cg19131227, cg19137676, cg13928782, cg01368777, cg25742037, cg02425416
BACH2	0.000481957	0.045429	0.498493	-0.40718	-1.73856	86	cg00786977, cg26535591, cg19039673, cg07914959, cg21495156, cg19785559, cg21335325, cg16897634, cg02795425, cg02486351, cg03035849, cg24667115, cg15555400, cg19694945, cg14855789, cg25256035, cg01757534, cg10361345, cg10913050, cg16571137, cg12859373, cg08757868, cg15147473, cg17161099, cg27644327, cg11559054, cg20849631, cg19181811, cg00114463, cg10595054, cg14199707, cg01462343, cg07960629, cg1…
GNAS	0.000500951	0.0464215	0.477271	0.36547	1.65509	154	cg22290117, cg07824914, cg18035618, cg12321149, cg10011623, cg08587534, cg03606258, cg07947033, cg17696847, cg27304369, cg25652859, cg18224653, cg14564778, cg09598225, cg22989942, cg26496204, cg09604333, cg26811638, cg23159236, cg05926269, cg06693667, cg02274728, cg20019489, cg08997444, cg10302550, cg25326570, cg19589727, cg00943909, cg06065549, cg25308079, cg15222215, cg04257105, cg03010274, cg2…
RCAN1	0.000271447	0.0318215	0.498493	0.462085	1.83605	67	cg23093164, cg08975523, cg05056497, cg20710013, cg13528349, cg05156137, cg14943847, cg02755978, cg08932388, cg02280643, cg21301258, cg06961160, cg11980866, cg16203983, cg20998111, cg16444542, cg25008977, cg01388223, cg06063372, cg15709587, cg23997074, cg09708275, cg26887740, cg24494581, cg03842809
C9orf7	0.00046501	0.0445768	0.498493	0.879435	1.85514	6	cg19123107, cg14524403, cg13413996, cg14110709, cg10570177
ZNF117	0.000407635	0.0411014	0.498493	0.883172	1.86303	6	cg24746838, cg06254253, cg03900028, cg00245878, cg15701779
BRICD5	0.000301871	0.0346662	0.498493	0.892822	1.88338	6	cg20963339, cg27399396, cg21432334, cg16892623, cg18840845
C14orf48	9.09149e-05	0.0173304	0.538434	0.943308	1.89387	5	cg24520070, cg08097631, cg04956882, cg05863098
TNXB	8.6854e-05	0.0172467	0.538434	0.475672	1.90999	71	cg03543593, cg20344925, cg14620908, cg14630933, cg17484510, cg02657865, cg09423875, cg09115485, cg07481886, cg26537323, cg00188055, cg07164109, cg09872737, cg11431261, cg19108771, cg22616343, cg25587092, cg23257604, cg02673305, cg18701983, cg06292891
CCDC183	1.44201e-05	0.00467691	0.593325	0.960951	1.92929	5	cg12509248, cg04689985, cg02718674
ODF3	0.000589552	0.0497532	0.477271	0.824404	1.94281	8	cg00979572, cg13470155, cg10335112, cg04874875, cg16225091, cg03070364
PKNOX2	4.72855e-06	0.00208704	0.610527	0.451909	1.94463	111	cg26840462, cg13297609, cg12407459, cg04164023, cg01519094, cg15727708, cg21324936, cg03252786, cg03774275, cg22777186, cg17045582, cg17655609, cg19027056, cg10928038, cg27629782, cg02390145, cg22878091, cg22690321, cg00898880, cg15115522, cg25367332, cg14670510, cg14573583, cg16239783, cg04727207, cg25284446, cg03419885, cg24332640, cg07646765, cg20964304, cg04700773, cg05403655, cg22041190, cg2…
ZSCAN12L1	5.4549e-05	0.0127615	0.557332	0.923862	1.94886	6	cg09156207, cg12623302, cg11517269, cg02631126, cg18105139, cg17849569
WFDC5	0.000565734	0.0487132	0.477271	0.78168	1.94987	10	cg06498481, cg25718438, cg26342637, cg11626007, cg12096720
PPYR1	0.000530098	0.0475378	0.477271	0.784376	1.95659	10	cg11861387, cg02394955, cg25344503, cg17771050, cg04127044, cg25761626, cg20491707, cg06939941, cg14087880
CLUH	0.000451849	0.0435296	0.498493	0.830612	1.95744	8	cg22379462, cg18734309, cg17330878, cg19905507, cg23941688, cg27147788
RPH3A	0.000428836	0.0426109	0.498493	0.619809	1.95867	24	cg08254200, cg20704159, cg01119407, cg00851732, cg05585303, cg01257889, cg09384610, cg14430008, cg22453284, cg12681402, cg23596620
NCR1	0.000198551	0.0260781	0.518848	0.876856	1.95869	7	cg17804112, cg14550066, cg18832619, cg11356156, cg13518366, cg12123879
CCL22	0.000451849	0.0435296	0.498493	0.831269	1.95899	8	cg23471482, cg08298591, cg02532928, cg07990805
GNG13	0.000512185	0.0465738	0.477271	0.705938	1.96	15	cg08370077, cg08861556, cg00671386, cg20590345, cg08074971, cg14100184, cg09611472, cg01865825
DLC1	0.000244192	0.0295853	0.498493	0.57965	1.96614	31	cg24960039, cg18478942, cg13253150, cg22732636, cg12512013, cg00933411, cg10349685, cg08768218, cg22860556, cg05226008, cg10574939, cg15623503, cg14904305, cg12121765, cg24819686, cg27336423
TNF	0.000395181	0.0408937	0.498493	0.690756	1.96657	17	cg26729380, cg21222743, cg21467614, cg01569083, cg10717214, cg14910524, cg03037030, cg10650821, cg08553327, cg19978379, cg24452282, cg04425624, cg21370522, cg08639424, cg19648923, cg12681001
SOD3	0.0004509	0.0435296	0.498493	0.709621	1.97022	15	cg16216407, cg21411366, cg10766585, cg17923553, cg03577139, cg05706652, cg03063309, cg10783026, cg11372436, cg16037589
TAPBP	0.000157396	0.0245247	0.518848	0.547039	1.97297	40	cg00602234, cg18144560, cg27168291, cg05210804, cg10134527, cg07895437, cg14288848, cg17055704, cg14309283, cg26646118, cg08771019, cg14096569, cg10376053, cg03000593, cg06097707, cg14473643, cg07160118, cg04678230, cg20185718, cg21330831, cg14258935
ARHGEF10L	0.000245971	0.0295853	0.498493	0.561137	1.97573	37	cg25979543, cg06980341, cg09854011, cg22945605, cg08947790, cg10115348, cg22204199, cg22496437, cg11824121, cg10513862, cg20335384, cg27071325, cg06570932, cg27607995, cg17285883, cg10543503, cg22491111, cg14585261, cg05380570, cg25936864, cg21908208, cg11624664, cg10123662, cg07240000, cg18641151
CD40	0.000549631	0.0479243	0.477271	0.811797	1.98326	9	cg11841529, cg01943874, cg09053081, cg17929951, cg22232207, cg21601405, cg06571407
SPESP1	0.000549631	0.0479243	0.477271	0.812648	1.98534	9	cg23698666, cg24750854, cg17286244, cg14554415, cg09886641, cg03066823, cg27236331
VTRNA1-3	0.000246225	0.0295853	0.498493	0.842887	1.98637	8	cg02529723, cg19065177, cg08777304, cg02053188, cg23910413, cg01063759
FBXL5	0.00030364	0.0346662	0.498493	0.796765	1.9875	10	cg01915895, cg01353608, cg15175162, cg19128498, cg02630888, cg03156769
POU2AF1	0.000398281	0.0408937	0.498493	0.756705	1.9916	12	cg20140034, cg10694914, cg19148410, cg07534554, cg17390301, cg18316498, cg05905611, cg11362935, cg24049888, cg01212326
NAALAD2	0.000537956	0.0475846	0.477271	0.741895	1.99447	13	cg26945217, cg16886581, cg01577414, cg14960550, cg23743573, cg05500015, cg12403137, cg09584827, cg05041596
AQP2	0.000358231	0.0386295	0.498493	0.758573	1.99651	12	cg12650635, cg17439122, cg20600729, cg24315042, cg07047653, cg00831237, cg09032651, cg25112641
UBE2L3	0.000511281	0.0465738	0.477271	0.743487	1.99875	13	cg17274080, cg25421647, cg26844104, cg17313420, cg26067319
ZNF268	0.00033363	0.0366805	0.498493	0.707853	2.0027	16	cg27156267, cg27239640, cg15619333, cg21287489, cg21808250, cg07172885, cg06088749, cg26418826
TNNT1	0.000319562	0.0359461	0.498493	0.776413	2.00406	11	cg19504245, cg10218876, cg19393762, cg24699670, cg18649823, cg22711187, cg21127534, cg00915671
OBSL1	0.000212826	0.0272473	0.518848	0.736537	2.00468	14	cg19780389, cg22065526, cg10157183, cg00036871, cg08493959, cg13858106
C1orf195	0.000322631	0.0360827	0.498493	0.762055	2.00567	12	cg09592954, cg24648947, cg10001905, cg22943795, cg22353206, cg23187532, cg19968649, cg06500017, cg12651933, cg01244557
C17orf98	0.000402659	0.0410248	0.498493	0.821085	2.00595	9	cg04487205, cg18343108, cg20084219, cg19760250, cg23290482, cg12552293, cg21852429
CACNA1S	0.000156596	0.0245247	0.518848	0.853426	2.01121	8	cg17810781, cg19765450, cg00095526, cg22815214
MIR886	5.57412e-05	0.0127615	0.557332	0.900388	2.01126	7	cg08745965, cg18678645, cg18797653, cg00124993, cg26896946, cg25340688, cg06536614
ABAT	5.81024e-05	0.0129962	0.557332	0.535393	2.01147	50	cg16586594, cg26778345, cg00220102, cg07336964, cg08834902, cg00231389, cg08241330, cg26915924, cg17118435, cg05372963, cg04332619, cg01881182, cg10292855, cg06228737
CHRM1	0.000218588	0.0278021	0.518848	0.707586	2.01449	17	cg03079104, cg07164152, cg06289725, cg25271892, cg01812577, cg13530039, cg25621420, cg14540819, cg00848283, cg03360907
C21orf56	0.000224342	0.0283242	0.518848	0.727113	2.01878	15	cg08742575, cg12016809, cg25545878, cg07747299, cg13012494, cg13732083, cg05896524
NKX6-3	0.000325143	0.0361559	0.498493	0.826642	2.01953	9	cg25883020, cg00448191, cg18256894, cg18227471, cg04624413, cg11952839, cg14958018, cg22282038
RBM44	0.00026988	0.0318215	0.498493	0.713828	2.01961	16	cg03761885, cg15417944, cg10471832, cg03424643, cg18844589, cg03257608, cg21103250, cg04701596, cg26587715, cg22883304, cg05413258, cg02447287
CCDC36	0.000201013	0.0260781	0.518848	0.709579	2.02016	17	cg04581018, cg03352189, cg03540175, cg17645601, cg11002923, cg11320271, cg22990125, cg14745517, cg12468774, cg02938205, cg00038298, cg04129430
FBXO44	0.000194423	0.0260683	0.518848	0.710732	2.02344	17	cg08587480, cg05796704, cg01420388, cg07426195, cg16077279, cg22697136, cg15746187
LOC285370	0.000146663	0.0237839	0.518848	0.813503	2.02925	10	cg19764594, cg17188574, cg14018079, cg22620414, cg11417259, cg00193283, cg06042395, cg26740639, cg23879460, cg22843684
GNASAS	4.12128e-05	0.0104156	0.557332	0.555812	2.03602	45	cg22290117, cg26102503, cg12321149, cg03606258, cg07947033, cg25652859, cg18224653, cg22989942, cg26496204, cg06693667, cg25326570, cg06065549, cg03010274, cg15160445, cg19592829, cg08091561, cg04677683, cg11669839, cg06200857, cg18935491, cg23249369, cg21938532, cg24617313, cg05309239, cg14176797, cg24203465, cg03908391, cg04457481, cg23484981
KLHL35	0.000180627	0.0251072	0.518848	0.789255	2.0372	11	cg09174715, cg03934926, cg02343736, cg20787146, cg12001148, cg05456789, cg21555796
CYP2E1	0.000176301	0.0250547	0.518848	0.789914	2.0389	11	cg01465364, cg21024264, cg00436603, cg08472147, cg26065573, cg19837601, cg19571004
PGLYRP1	0.000146092	0.0237839	0.518848	0.716347	2.03943	17	cg26767632, cg22559329, cg12215528, cg08682981, cg08693172, cg14001023, cg07519471, cg22024140, cg25754173, cg13895329, cg10862535, cg14131693, cg24917775, cg04850152, cg15543489
C19orf77	2.28154e-05	0.00683058	0.57561	0.913606	2.04078	7	cg06666376, cg18795569, cg15148078, cg22105158, cg03107987
FKBP11	0.000370129	0.0390424	0.498493	0.681037	2.04491	20	cg05999245, cg15147435, cg11067907, cg15620146, cg21908259, cg11557857, cg22647178, cg01612057, cg23699916, cg05883907, cg21672339, cg19190217, cg23692087, cg13203223
RNPS1	0.000102717	0.018508	0.538434	0.701188	2.04762	19	cg08301299, cg22137448, cg19253177, cg05351219, cg00668442, cg06728335, cg01555029, cg00876678, cg06314129, cg19257829, cg27592465
TEX28	0.000197714	0.0260781	0.518848	0.723748	2.04767	16	cg08689075, cg03027462, cg26803301, cg06118265, cg23106779, cg07356189, cg07964550, cg01807421, cg27436891, cg03160597, cg22451002
INHA	0.000133954	0.0226673	0.518848	0.778014	2.04768	12	cg19780389, cg22065526, cg10157183, cg00036871, cg08493959, cg13858106
C20orf151	0.000172486	0.0250547	0.518848	0.839778	2.05162	9	cg17976205, cg17565967, cg13290149, cg06154311, cg07704824, cg03359095
PEX11B	0.00020778	0.0267774	0.518848	0.676984	2.06087	21	cg16150483, cg20962684, cg22809229, cg16943234, cg11962587, cg17934390, cg13388568
FBXO47	9.41877e-05	0.0173304	0.538434	0.783754	2.06279	12	cg00055529, cg14399930, cg26740942, cg22361859, cg23965214, cg04120272, cg16530382, cg09475901, cg10600889
RAB17	7.9555e-05	0.0161265	0.538434	0.759191	2.06634	14	cg04044224, cg11039806, cg14405815, cg06353069, cg13793049, cg12935818, cg01157280, cg13856643
ZNF876P	7.40922e-06	0.00294252	0.610527	0.927349	2.07148	7	cg23063647, cg13535626, cg14186187, cg17030981, cg08744727, cg18005867
SLCO6A1	7.76637e-05	0.0159088	0.538434	0.787811	2.07346	12	cg26192556, cg16713841, cg14719865, cg26398586, cg01714149, cg00944166, cg07704990
GPR81	0.000124366	0.0214932	0.518848	0.772916	2.07786	13	cg19328828, cg22972858, cg19975916, cg23505823, cg01306688, cg13702536, cg09745246, cg20566840, cg15823495, cg05290737
LDHD	4.55875e-05	0.0110892	0.557332	0.833483	2.07909	10	cg07320140, cg24429836, cg09899215, cg16540789, cg04906242, cg03085549, cg03743982
SH3BP2	1.03669e-05	0.00387962	0.593325	0.545075	2.07985	56	cg22198044, cg01710886, cg07991621, cg23613051, cg10745272, cg25335944, cg08822227, cg01413404, cg10869531, cg05336051, cg00412094, cg18403548, cg15569052, cg17749374, cg00231918, cg10322254
CSDC2	9.25417e-05	0.0173304	0.538434	0.778962	2.09412	13	cg21250100, cg25447894, cg14335069, cg24955672, cg13571020, cg18174542, cg20099005, cg19384704
CCER2	6.55639e-05	0.0141764	0.538434	0.858267	2.09679	9	cg04948230, cg26763855, cg06822697, cg15015917, cg06180200, cg18978232, cg27096892
SYCP1	5.6614e-05	0.0128106	0.557332	0.756066	2.09917	15	cg18087477, cg07832006, cg04987755, cg24985030, cg07724623, cg20441021, cg17696091, cg04115969, cg09685601, cg27332337, cg24330514, cg18396987, cg10440578, cg23257564, cg03964233
MUC4	7.31212e-05	0.0154667	0.538434	0.743403	2.10328	16	cg08049923, cg15140981, cg07399928, cg19983801, cg15589427, cg23280655, cg08597092, cg03123551, cg13002712, cg21549260, cg10593292, cg10237854
COL7A1	5.54293e-05	0.0127615	0.557332	0.816523	2.10758	11	cg12448161, cg00178511, cg00158683, cg11846236, cg16357381, cg14957943, cg23328613, cg17913386
MTMR11	5.14924e-05	0.0122338	0.557332	0.788087	2.11865	13	cg00777271, cg24620905, cg17353890, cg26645700, cg03659817, cg02086349, cg05750047, cg13476072
BLCAP	1.16742e-07	0.000119568	0.704976	0.496851	2.1234	107	cg24338351, cg18433380, cg03615235, cg23605670, cg22378853, cg04489586, cg23566503, cg17971649, cg17271585, cg16648571, cg25962605, cg23757721, cg00576435, cg14213844, cg14393502, cg10642330, cg22943498, cg10981598, cg14765818, cg17643025, cg07360805, cg22551578, cg13690564, cg14469070, cg15440392, cg13790727, cg12862537, cg07156273, cg21588305, cg12152206, cg22421148, cg22510412, cg13708635, cg2…
MRGPRF	2.95243e-05	0.00809215	0.57561	0.674439	2.13131	24	cg02920396, cg13734833, cg12642521, cg24241586, cg21447477, cg12405136, cg05771342, cg22986999, cg13997720, cg10417531, cg19738774, cg01289483, cg25807487, cg23882131, cg27214458
MUC12	1.08797e-05	0.00390802	0.593325	0.856539	2.1366	10	cg20238355, cg20688289, cg03982074, cg00841151, cg26802830, cg16641538
GDF2	1.77923e-05	0.00549585	0.57561	0.786024	2.13938	14	cg06840491, cg23812775, cg17200137, cg13321164, cg00495658, cg26011189, cg25943845, cg15247509, cg05441133
BCL9L	1.5076e-05	0.00480949	0.593325	0.788395	2.14583	14	cg11507178, cg02493211, cg04075973, cg08805054, cg12232470, cg02341556, cg20029201, cg03780927, cg20337103, cg11874426, cg14542374
CYP27C1	2.33129e-05	0.00687378	0.57561	0.834286	2.15343	11	cg21855830, cg01665559, cg09199330, cg04946274, cg10985347, cg23280866, cg19989151, cg17940908
FLJ44606	1.42056e-05	0.00467691	0.593325	0.760586	2.16538	17	cg14340928, cg21113900, cg17848407, cg18710053, cg15405432, cg26972554, cg10812634, cg05001932, cg22905511, cg27097438, cg02304092, cg10200291
TCP11	1.28567e-05	0.00443808	0.593325	0.761726	2.16862	17	cg07923390, cg19581426, cg16083558, cg01108476, cg21646955, cg13423262, cg11852643, cg14562060, cg05235151, cg25299750, cg19673462, cg24623244
GLIPR1L2	4.26999e-06	0.00198265	0.610527	0.871611	2.1742	10	cg07311024, cg02071292, cg00108944, cg23588049, cg02415057, cg12351126, cg20291222, cg14292619
TTLL10	1.29995e-05	0.00443808	0.593325	0.673434	2.17808	26	cg23275914, cg05555852, cg07173112, cg07841371, cg23857983, cg18770446, cg22047469, cg17168771, cg14220262, cg03278726, cg08933284, cg15417666, cg27631599, cg14709479
ZNF274	2.61593e-05	0.00739065	0.57561	0.670459	2.18996	27	cg00298065, cg07815836, cg14239592, cg22356268, cg19416570, cg03099728, cg11335411, cg08607280, cg22720790, cg00647741, cg25653761, cg26698460, cg13225358, cg18436643, cg00479990, cg16509863
FGF20	1.0141e-05	0.0038695	0.593325	0.850233	2.1946	11	cg06143905, cg05190285, cg11196848, cg17808882, cg06872257, cg24030449, cg27110277, cg23143189, cg01003803
TEKT4	4.27911e-06	0.00198265	0.610527	0.898452	2.19496	9	cg09935512, cg02150767, cg05852568, cg06383022, cg05723825, cg03315696, cg06282964, cg07988218
EID3	6.44299e-06	0.00266767	0.610527	0.79783	2.21513	15	cg18633684, cg21234561, cg00588621, cg10572274, cg27205904, cg01848457, cg20923245, cg09477407, cg05057777, cg26614816, cg25274376
PM20D1	2.83855e-06	0.00145364	0.627257	0.869811	2.24513	11	cg07157834, cg16334093, cg05841700, cg11965913, cg26354017, cg07533224, cg24503407, cg14159672, cg12898220, cg07167872, cg14893161
PIWIL1	2.52491e-06	0.00132797	0.627257	0.695585	2.24972	26	cg23887609, cg24838063, cg12122741, cg27261050, cg26677194, cg13861644, cg11931211, cg27147004, cg23548151, cg12020444, cg18319102, cg06365016, cg24229701, cg27630820, cg11511495, cg19424457, cg23081604, cg02382037, cg16244664, cg03730519, cg14489632
PLEKHB1	4.26166e-06	0.00198265	0.610527	0.736961	2.26014	22	cg04313735, cg26776957, cg25288155, cg24176731, cg13361558, cg07013104, cg02254407, cg11512608, cg24261333, cg23834228, cg07689920, cg08246800, cg18150674
WFIKKN2	1.7658e-06	0.00101066	0.643552	0.700767	2.26648	26	cg25420614, cg03905005, cg20889395, cg07168556, cg10690919, cg19085402, cg00463502, cg00003625, cg13639451, cg10408284, cg22842797, cg20493283, cg17203352, cg01234610, cg14110885, cg13375248
CHRND	9.55147e-07	0.000646708	0.643552	0.886068	2.28709	11	cg22276371, cg11641416, cg12344964, cg20371266, cg09988676, cg23398241, cg06854311, cg05875017
AVP	1.08678e-08	1.40992e-05	0.74774	0.93154	2.32369	10	cg25551168, cg16536918, cg15313891, cg04632887, cg23169111, cg05136169, cg02187522, cg24025566
MAS1L	3.05741e-07	0.000247905	0.674963	0.839152	2.32985	15	cg26371172, cg07511633, cg12423733, cg25730428, cg09083279, cg20168024, cg18281744, cg13305823, cg25798600
CMYA5	5.59475e-09	8.37491e-06	0.761461	0.935947	2.33468	10	cg04154027, cg23279355, cg03546977, cg09655403, cg11438310, cg10257870, cg15197065, cg09481121
LDHC	1.67915e-07	0.000148529	0.690132	0.905325	2.3368	11	cg08418111, cg21471707, cg14332815, cg19767548, cg14259717, cg11821245, cg07398106, cg07093428, cg09332484
CAT	1.34818e-07	0.000131178	0.690132	0.888895	2.33951	12	cg25060988, cg06908474, cg07768201, cg01847719, cg02109652, cg20731136, cg03720043, cg22159421, cg06027906, cg02564456
KLK8	1.39066e-09	2.70622e-06	0.788187	0.959013	2.34291	9	cg19149785, cg22898362, cg26749518, cg25134071, cg26651782, cg08473487, cg05777061, cg13388253
COX4I2	7.96261e-09	1.1068e-05	0.74774	0.903108	2.42786	13	cg11704513, cg12033622, cg17116120, cg26070540, cg21543589, cg08918020, cg26844208, cg27413508
PLD6	8.89631e-10	2.16403e-06	0.801216	0.891298	2.47464	15	cg19093370, cg11392858, cg24578857, cg14099398, cg03292213, cg25393494, cg11713493, cg02880176, cg23448998, cg16340422, cg26539818, cg00572586, cg23661344, cg00860641
CPT1B	1.45733e-08	1.66821e-05	0.74774	0.821818	2.50177	21	cg16386697, cg17952465, cg10770023, cg16970343, cg17137457, cg07003941, cg00983520, cg02245810, cg01081346, cg10490842, cg19112186, cg06530441, cg24363820, cg05156901, cg27502912, cg00270625, cg08260245, cg00047287
ZC3H12D	2.78271e-10	9.02527e-07	0.814036	0.833061	2.60397	23	cg18082788, cg17501395, cg00073460, cg13136655, cg09678939, cg18951352, cg07481398, cg03982376, cg04275695, cg15132169, cg06762457, cg26552754, cg07592095, cg15559674, cg00695799, cg00417851, cg02464487
LRRC14B	1e-10	3.892e-07	#N/A	0.957199	2.65761	15	cg01239922, cg19091930, cg03553576, cg24814621, cg18443893, cg26866348, cg13787932, cg15351009, cg19858576, cg12711961, cg24696500, cg23508534, cg00607051, cg15730313
NNAT	1e-10	3.892e-07	#N/A	0.796462	2.89181	42	cg24338351, cg18433380, cg03615235, cg23605670, cg22378853, cg04489586, cg23566503, cg16648571, cg25962605, cg23757721, cg00576435, cg22943498, cg10981598, cg14765818, cg17643025, cg07360805, cg22551578, cg13690564, cg14469070, cg13790727, cg12862537, cg07156273, cg21588305, cg22421148, cg22510412, cg13708635, cg25712981, cg01466133, cg24675557, cg20783699, cg11174847, cg24762053, cg03061677, cg2…
